# Supplementary material for: An enzyme cascade sensor with resistance to the inherent intermediate product by logic-controlled peroxidase mimic catalysis
Source: Royal Society of Chemistry journal article supplement (doi:10.1039/d0cc08284h), 2021-01-01
Supplement: d0cc08284h1.pdf [file d0cc08284h1.pdf]

## Electronic Supplementary Information (ESI)

An enzyme cascade sensor with resistance to inherent intermediate product by logic-controlled peroxidase mimic catalysis

**Renzhong Yu,<sup>a ‡</sup> Rui Wang,<sup>a ‡</sup> Zhaoyin Wang,<sup>a</sup> Bo Liu,<sup>a</sup> Xue He<sup>a</sup> and**

**Zhihui Dai<sup>\* a,b</sup>**

*<sup>a</sup>Jiangsu Collaborative Innovation Center of Biomedical Functional Materials and Jiangsu Key Laboratory of Biofunctional Materials, School of Chemistry and Materials Science, Nanjing Normal University, Nanjing, 210023, P. R. China.*

*<sup>b</sup>Nanjing Normal University Center for Analysis and Testing, Nanjing, 210023, P. R. China.*

*\*Tel./Fax: +86-25-85891051. E-mail: daizhihui@njnu.edu.cn. (Z. Dai);*

*‡ These authors contributed equally*

## **Experimental Section**

### **Materials and reagents.**

Hydrogen peroxidase (30%); potassium permanganate; sodium chloride; calcium chloride dihydrate; potassium chloride; ammonium chloride; sodium sulfate and potassium phosphate were provided by the Sinopharm Chemical Reagent Co., Ltd (China). Polyvinyl pyrrolidone (PVP) and glucose oxidase (GOx) were purchased from the Sigma-Aldrich Co., Ltd. (USA). Copper (II) chloride dihydrate and 3,3',5,5'-tetramethylbenzidine (TMB) were obtained from Aladdin Reagent Co. (Shanghai, China). Horseradish peroxidase (HRP); glucose; sucrose; maltose; fructose; lactose; urea and creatinine were bought from Sangon Biotech. (China). The G-quadruplex DNA (GGGTTAGGGTTAGGGTTAGGG) was synthesized by the Sangon Biotech. (China). All the reagents were of analytical grade or higher and all solutions were prepared using ultrapure water ( $18.2 \text{ M}\Omega \text{ cm}^{-1}$ ) from a Milli-Q water system (Millipore Co., USA).

### **Apparatus.**

The transmission electron microscopy (TEM) image was taken on a JEOL-2100F HRTEM microscope (JEOL, Japan). The XRD pattern was recorded by a Rigaku D/max 2500 diffractometer (Rigaku Co., Japan). The pH values of the solutions were measured by an Ohaus starter 3100 digital pH-meter (Ohaus Co., USA). The UV-vis absorption data were recorded by an Agilent Cary 60 spectrophotometer (Agilent Co., USA) and a Multiskan GO microplate reader (Thermo Fisher Scientific, USA).

### **Synthesis of copper peroxide (CP) nanodots.**

CP nanodots were synthesized according to the previous report.<sup>1</sup> Firstly, a 5 mL solution containing 0.5 g PVP and 0.01 M copper (II) chloride dihydrate ( $\text{CuCl}_2 \cdot 2\text{H}_2\text{O}$ ) was magnetically stirred. Then, 5 mL 0.02 M NaOH and 100  $\mu\text{L}$  30 %  $\text{H}_2\text{O}_2$  were added successively. After 30 minutes, the CP nanodots was obtained and washed by ultrafiltration. The product was further lyophilized and redissolved in ultrapure water to obtain a 50 mg/mL solution and stored at 4 degree in dark.

#### **Colorimetric detection based on the proposed method.**

For the establishment of the glucose standard curve of the reported method, the glucose was firstly incubated with 0.04 mg/mL GOx in 0.2 mM pH 7.4 PBS for 30 min. Then, 100  $\mu\text{L}$  of the above mixture was mixed with G-quadruplex ( $\text{G}_4$ ), CP nanodots, TMB and the final volume is 250  $\mu\text{L}$  (final concentrations: 200 nM  $\text{G}_4$ , 2 mg/mL CP nanodots, 0.5 mM TMB and different concentrations of glucose). Then, the solutions were further incubated for 120 min. After that, the UV-vis spectra were recorded by the microplate reader.

#### **Colorimetric assay of hydroxyl groups released by CP nanodots decomposition.**

According to the previous protocol,<sup>1</sup>  $\text{KMnO}_4$  was firstly dissolved in 0.1 M  $\text{H}_2\text{SO}_4$  to obtain a 50  $\mu\text{g/mL}$  solution. After that, 200  $\mu\text{L}$  of the  $\text{KMnO}_4$  solution was mixed with 20  $\mu\text{L}$  50 mg/mL CP nanodots or 20  $\mu\text{L}$  10 mM  $\text{H}_2\text{O}_2$  separately and incubated for 10 min. After that, the UV-vis spectra were recorded by the microplate reader.

#### **Measurement for the final pH value after glucose incubation.**

Typically, the glucose was firstly incubated with 0.04 mg/mL GOx in pH 7.4 PBS for 30 min. Then the mixture was mixed with ultrapure water with the volume ratio of 1:1.5

and the total volume was 5 mL. After further incubation of 120 min, the pH value of the solution was measured by the digital pH meter.

#### **Colorimetric detection based on the GOx-HRP method**

Typically, the glucose was incubated with GOx (0.04 mg/mL) for 30 min, and then 100  $\mu$ L of the mixture was added to 150  $\mu$ L PBS (50 mM pH 5) which containing 5 ng/mL HRP and 1 mM TMB. After incubated for another 10 min, the absorbance at 652 nm for the above 250  $\mu$ L reaction systems with different glucose concentrations were recorded.

#### **Determination of glucose in the artificial urine.**

The artificial urine (AU) was prepared according to the previous report.<sup>2-4</sup> As reported, the concentration of glucose in the urine of healthy people is below 0.8 mM and it is clinically relevant above 2.5 mM.<sup>5-6</sup> For glucose determination, 5.5 mM glucose was spiked ( $\approx$ 100 mg/dL).<sup>7</sup> Before determination, the AU was diluted using ultrapure water and the pH was adjusted to 7.4. After that, the GOx was spiked with the concentration of 0.04 mg/mL and incubated for 30 min. Then, the above GOx-AU mixtures were separately applied for the proposed method and the GOx-HRP method, which both with final volumes of 250  $\mu$ L and the following experiments are same as those described in the **Colorimetric detection based on the proposed method** and **Colorimetric detection based on the GOx-HRP method** separately. The final glucose concentration in the 250  $\mu$ L reaction systems were calculated to be  $\approx$  42.3  $\mu$ M on account of the sample treatment and detection procedures. For the anti-inherent H<sub>2</sub>O<sub>2</sub> experiment, same procedures were performed as above except that 1.2  $\mu$ M H<sub>2</sub>O<sub>2</sub> was spiked in the

250  $\mu\text{L}$  reaction systems of both the proposed method and the GOx-HRP method.

## Figures

### Fig. S1-S5 Characterization of the synthesized CP nanodots

The synthesized CP nanodots were characterized. As shown in the transmission electron microscope (TEM) image (Fig. S1), the CP nanodots exhibited a spherical morphology with a small diameter of less than 5 nm. In addition, the UV-vis spectrum showed UV-vis absorption below 600 nm (Fig. S2) and the X-ray diffraction (XRD) pattern exhibited a wide diffraction peak at approximately  $21.1^\circ$  (Fig. S3). The  $\text{MnO}_4^-$  test was applied to confirm the existence of the peroxo groups in the synthesized CP nanodots. As shown in Fig. S4, the colour of the acidic  $\text{MnO}_4^-$  disappeared when CP nanodots were added. This result could be ascribed to the fact that the CP nanodots quickly dissociated under strongly acidic conditions and generated  $\text{H}_2\text{O}_2$ , which reduced  $\text{MnO}_4^-$  to colourless  $\text{Mn}^{2+}$ . All the above characterizations agreed with the original literature for CP nanodot preparation and demonstrated the successful synthesis of CP nanodots.<sup>1</sup> In addition, the pH decrease induced by GOx catalysed glucose oxidation was also confirmed by using methylene red as the pH indicator, which showed an obvious red colour after 30 min of incubation with glucose, while the colour of the blank was still yellow (Fig. S5).

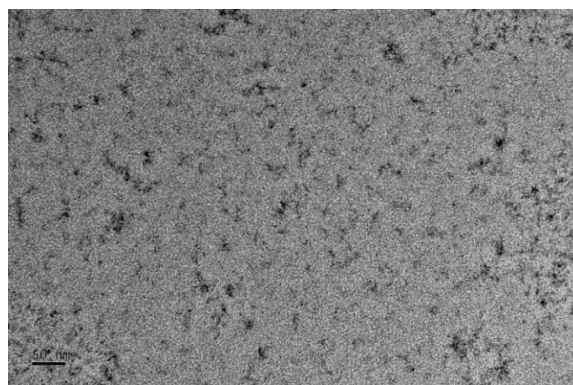

Figure S1 TEM image of the CP nanodots.

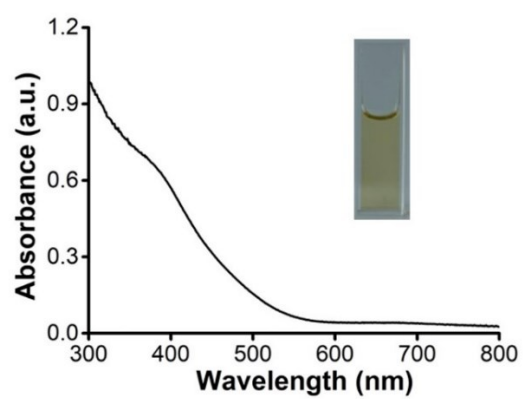

Figure S2 UV-vis absorption spectrum of the synthesized CP nanodots. Inset: digital photo of the synthesized CP nanodots.

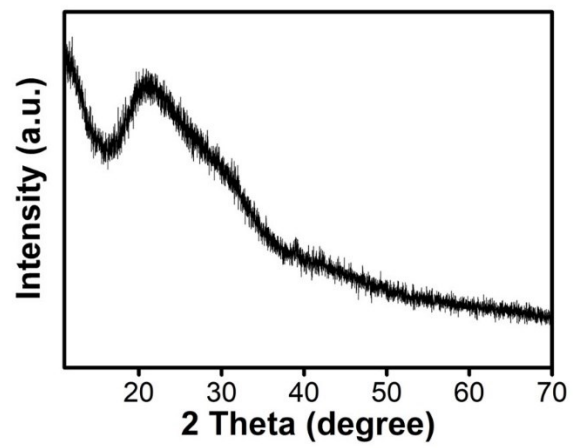

Figure S3 XRD pattern of the synthesized CP nanodots.



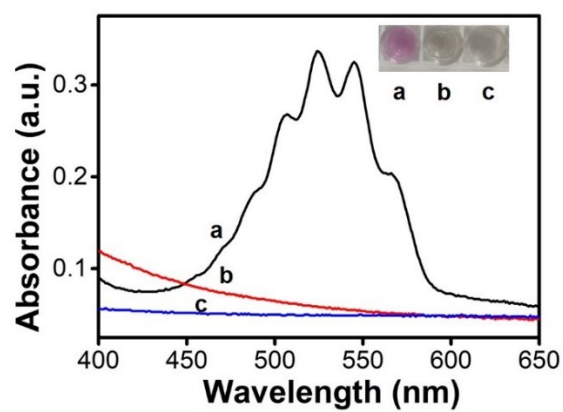

Figure S4  $\text{MnO}_4^-$ -based colorimetric test for the peroxy groups in CP nanodots. a:  $\text{MnO}_4^-$ , b:  $\text{MnO}_4^- + \text{CP nanodots}$ . c:  $\text{MnO}_4^- + \text{H}_2\text{O}_2$ .

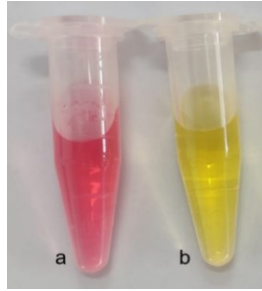

Figure S5 Methyl red test for the pH decrease introduced by the GOx catalyzed glucose oxidation. (0.2 mM pH 7.4 PBS); a: with 1 mM glucose; b: without glucose.

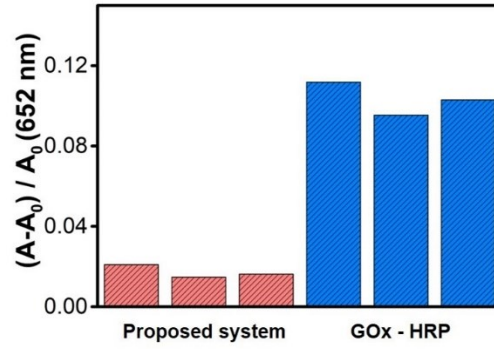

Figure S6. Comparison of the effect of additional  $H_2O_2$  on the proposed “AND” logic-based cascade system (red columns) and the classical enzyme cascade reaction (GOx-HRP, blue columns).  $A$  and  $A_0$  are the colorimetric signals of  $200 \mu M$  glucose with and without additional  $20 \mu M H_2O_2$ .

### **Fig. S7-S10 Optimization of the detection parameters**

Before the detection of glucose, some experimental parameters, such as the concentrations of GO<sub>x</sub>, CP nanodots and G<sub>4</sub> were optimized. As shown in Fig. S7, the colorimetric signal gradually increased with increasing GO<sub>x</sub> concentration below 0.04 mg mL<sup>-1</sup>, which was chosen as the optimum GO<sub>x</sub> concentration. In addition, the concentrations of CP nanodots and G<sub>4</sub> were also optimized (Fig. S8 and S9). Then, 2 mg mL<sup>-1</sup> CP nanodots and 200 nM G<sub>4</sub> were chosen as the optimum concentrations in the final reaction system. The incubation time after adding G<sub>4</sub>, CP nanodots and TMB to the glucose-GO<sub>x</sub> solution was also optimized. As shown in Fig. S10, the colorimetric signal did not show an obvious further increase after 120 min; thus, these conditions were chosen for the experiments.

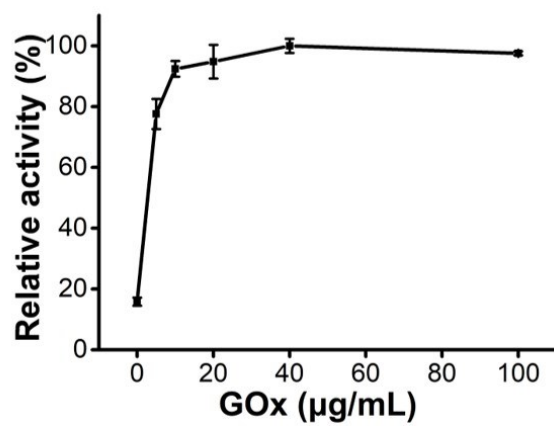

Figure S7 Optimization for the concentration of GOx.

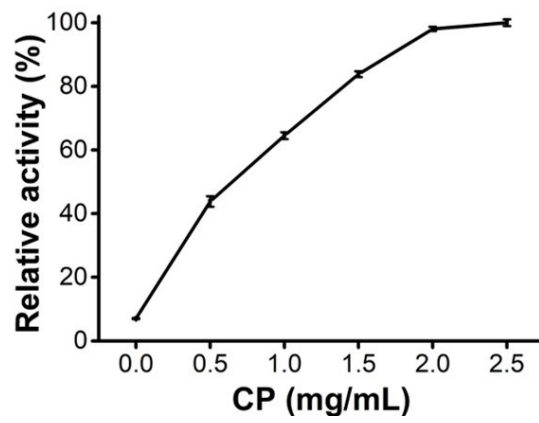

Figure S8 Optimization for the concentration of CP nanodots.

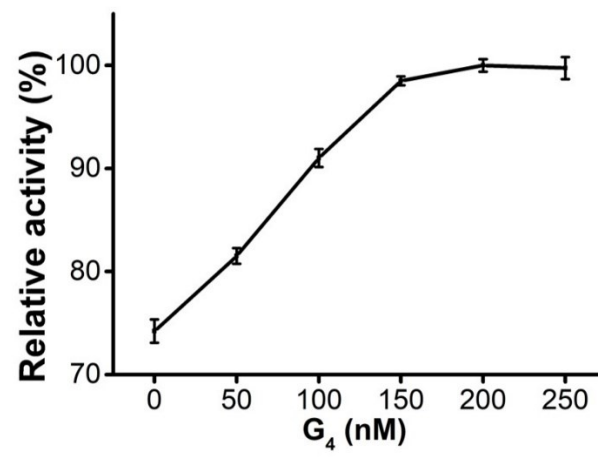

Figure S9 Optimization for the concentration of G<sub>4</sub> DNA.

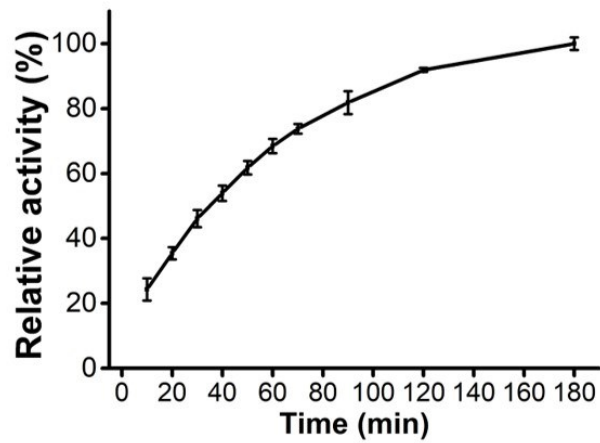

Figure S10 Optimization for the reaction time after the addition of G<sub>4</sub>, CP nanodots and TMB to the GOx-glucose.



## Tables

Table S1 Comparison of the proposed strategy with some recently reported colorimetric glucose sensors.

| Method       | Linear range       | LOD          | Reference |
|--------------|--------------------|--------------|-----------|
| Colorimetric | 0 - 0.8 mM         | 11.4 $\mu$ M | 8         |
|              | 0.1 - 0.5 mM       | 0.03 mM      | 9         |
|              | 100 - 1000 $\mu$ M | 2.31 $\mu$ M | 10        |
|              | 10 - 300 $\mu$ M   | 9.2 $\mu$ M  | 11        |
|              | 1 - 100 $\mu$ M    | 4.12 $\mu$ M | 12        |
|              | 8 - 140 $\mu$ M    | 2.67 $\mu$ M | 13        |
|              | 20 -1000 $\mu$ M   | 8.34 $\mu$ M | This work |

## References

- 1 L. Lin, T. Huang, J. Song, X. Ou, Z. Wang, H. Deng, R. Tian, Y. Liu, J. Wang, Y. Liu, G. Yu, Z. Zhou, S. Wang, G. Niu, H. Yang, X. Chen, *J. Am. Chem. Soc.* 2019, **141**, 9937.
- 2 C. J. Collins, A. Berduque, D. W. M. Arrigan, *Anal. Chem.* 2008, **80**, 8102.
- 3 T. S.C.R. Rebelo, C. M. Pereira, M. G. F. Sales, J. P. Noronha, F. Silva, *Electrochim. Acta* 2016, **190**, 887.
- 4 N. Laube, B. Mohr, A. Hesse, *J. Cryst. Growth*, 2001, **233**, 367.
- 5 E. W. Nery, M. Kundys, P. S. Jeleń and M. Jönsson-Niedziółka, *Anal. Chem.*, 2016, **88**, 11271.
- 6 A. W. Martinez, S. T. Phillips, M. J. Butte, G. M. Whitesides, *Angew. Chem. Int. Ed.*, 2007, **46**, 1318.
- 7 B. U. Moon, S. Koster, K. J. C. Wientjes, R. M. Kwapiszewski, A. J. M. Schoonen, B. H. C. Westerink, E. Verpoorte, *Anal. Chem.* 2010, **82**, 6756.
- 8 C. Ma, Y. Zhang, Q. Liu, Y. Du, E. Wang, *Anal. Chem.* 2020, **92**, 5319.
- 9 J. Xiao, Y. Liu, L. Su, D. Zhao, L. Zhao, X. Zhang, *Anal. Chem.* 2019, **91**, 14803.
- 10 Z. Kang, R. K. Kankala, B. Chen, C. P. Fu, S. B. Wang, A. Z. Chen, *ACS Appl. Mater. Interfaces* 2019, **11**, 28781.
- 11 Q. Wang, X. Zhang, L. Huang, Z. Zhang, S. Dong, *Angew. Chem., Int. Ed.* 2017, **56**, 16082.
- 12 G. Vinothkumar, I. L. Arun. K. S. Babu, *Inorg. Chem.* 2019, **58**, 349.
- 13 H. Huang, W. Zhang, L. Lei, J. Bai, J. Li, D. Song, J. Zhao, J. Li, Y. Li, *New J. Chem.* 2020, **44**, 12741.
